# Supplementary material for: SIRT6 promotes osteogenic differentiation of mesenchymal stem cells through BMP signaling
Source: PubMed Central journal article supplement (PMC5578964; doi:10.1038/s41598-017-10323-z), 2017-08-31

## Supplemental Information

### **SIRT6 promotes osteogenic differentiation of mesenchymal stem cells through BMP signaling**

Ping Zhang<sup>a,b</sup>, Yunsong Liu<sup>a,b</sup>, Yuejun Wang<sup>a,b</sup>, Min Zhang<sup>a,b</sup>, Longwei Lv<sup>a,b</sup>, Xiao Zhang<sup>a,b</sup>, Yongsheng Zhou<sup>a,b,\*</sup>

a Department of Prosthodontics, Peking University School and Hospital of Stomatology, Beijing 100081, China

b National Engineering Lab for Digital and Material Technology of Stomatology, Peking University School and Hospital of Stomatology, Beijing 100081, China

\* Corresponding author: Yongsheng Zhou, Department of Prosthodontics, Peking University School and Hospital of Stomatology, 22 Zhongguancun South Avenue, Haidian District, Beijing 100081, China.

Tel.: +86 10 82195370; fax: +86 10 62173402.

E-mail address: kqzhouysh@hsc.pku.edu.cn

#### **Supplemental Fig. 1**

(A) The knockdown efficiency of *SIRT6* in MSCs was validated by fluorescence microscopy. A1, bright field of Scrsh cells; A2, GFP-Scrsh positive cells; A3, merge of bright field and GFP-positive cells. B1, bright field of SIRT6sh#1 cells; B2, GFP-SIRT6sh#1 positive cells; B3, merge of B1 and B2. C1, bright field of SIRT6sh#2 cells; C2, GFP-SIRT6sh#2 positive cells; C3, merge of C1 and C2. Scale bar represents 100

µm. (B) Knockdown of *SIRT6* in MSCs was validated by RT-qPCR. (C) The knockdown of *SIRT6* inhibited the expression of *SP7* in MSCs, as determined by RT-qPCR. (D) mRNA expressions of SIRT1-SIRT7 in SIRT6 knockdown cells. All data are shown as mean  $\pm$  SD, n = 3. \*\*\* $P < 0.001$ . pm: proliferation media; om: osteogenic media.

### **Supplemental Fig. 2**

(A-B) Knockdown of *SIRT1* in MSCs was validated by western blotting and RT-qPCR. (C-D) *SIRT1* knockdown decreased ALP activity in MSCs. Control or *SIRT1* knockdown MSCs were treated with proliferation- or osteogenesis-inducing media for 7 days for ALP staining (C), and cellular extracts were prepared to quantify ALP activity (D). Knockdown of *SIRT6* inhibited the expression of *RUNX2* (E) and *ALP* (F) in MSCs, as determined by quantitative real-time RT-PCR. All data are shown as mean  $\pm$  SD, n = 3. \*\*\* $P < 0.001$ . pm: proliferation-inducing media; om: osteogenic-inducing media.

### **Supplemental Fig. 3**

(A) Rescue of WT or mutant *SIRT6* cell line, as validated by fluorescence microscopy. A1, bright field of vector-transfection in GFP- *SIRT6*sh cells; A2, GFP-*SIRT6*sh positive cells with vector transfection; A3, merge of A1 and A2. B1, bright field of flag-*SIRT6* (WT) infection in *SIRT6*sh cells; B2, GFP-*SIRT6*sh/ flag-*SIRT6* (WT) positive cells; B3, merge of B1 and B2. C1, bright field of flag-*SIRT6* (HY) infection in *SIRT6*sh cells; C2, GFP-*SIRT6*sh/ flag-*SIRT6* (HY) positive cells; C3, merge of C1 and C2.

Scale bar represents 100  $\mu$ m. (B) Rescue of WT or mutant *SIRT6* cell line was validated by RT-qPCR. (C-D) Overexpression of *SIRT6* promoted the expression of *SP7* (C) and *RUNX2* (D) in MSCs, as determined by RT-qPCR. All data are shown as mean  $\pm$  SD, n = 3. \* $P$  < 0.05, \*\* $P$  < 0.01 and \*\*\* $P$  < 0.001. pm: proliferation media; om: osteogenic media.

#### **Supplemental Fig. 4**

(A-B) *ALP* (B) and *RUNX2* (C) mRNA expression by RT-qPCR in control, *SIRT6*-Knockdown, *SIRT6*-Knockdown + BAY 117082 (2  $\mu$ M) and *SIRT6*-Knockdown + BMP2 100ng/ml groups. All data are shown as mean  $\pm$  SD, n=3. \*\*\* $P$  < 0.001. pm: proliferation media; om: osteogenic media.

#### **Supplemental Fig. 5**

(A-B) *PCAF* knockdown diminishes the effect of *SIRT6* on *BMP4* (A) and *BMP2* (B) expression, as determined by RT-qPCR analysis. (C-D) Overexpression of *PCAF* in *SIRT6* knockdown cells reversed the decreased expression of *BMP4* (C) and *BMP2* (D). (E-F) ChIP analysis detected *PCAF* at the promoters of *BMP4* (E) and *BMP2* (F) in WT and *SIRT6* knockdown MSCs. All data are shown as mean  $\pm$  SD, n=3. \* $P$  < 0.05 and \*\*\* $P$  < 0.001.

#### **Supplemental Fig. 6**

(A-B) Trabecular separation (A) and thickness (B) were detected in both sham and

OVX-ed mice. \* $P < 0.05$  and \*\* $P < 0.01$ .

# SFig. 1

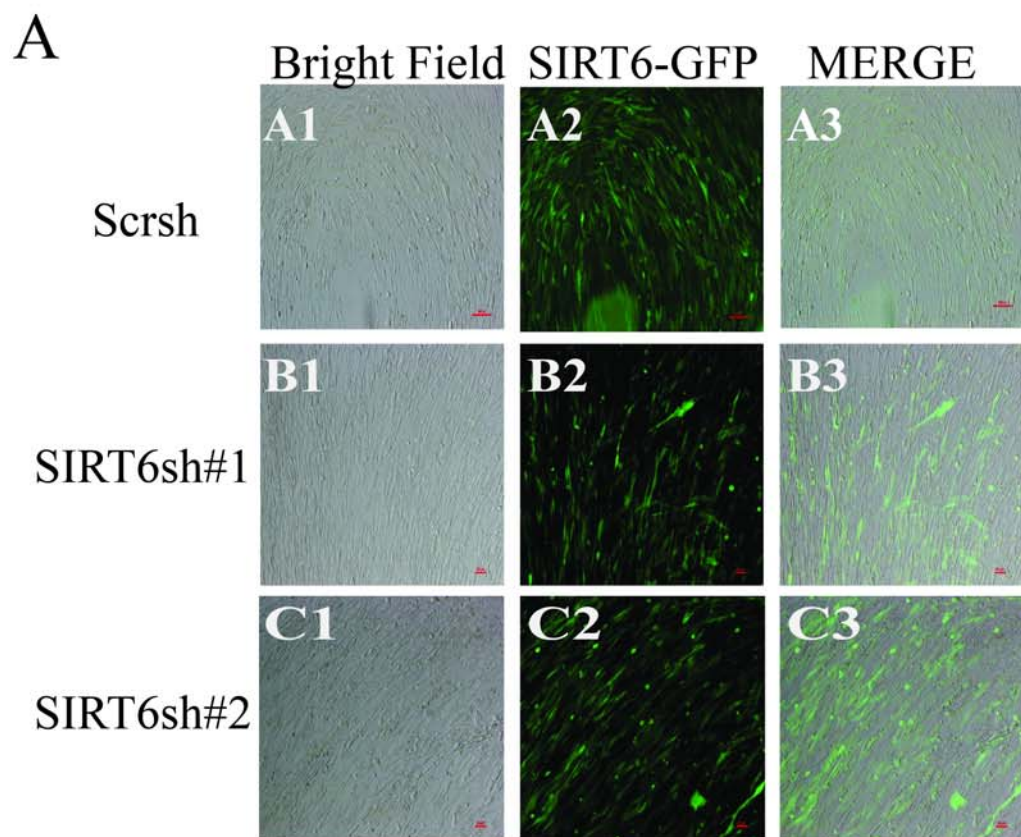

4

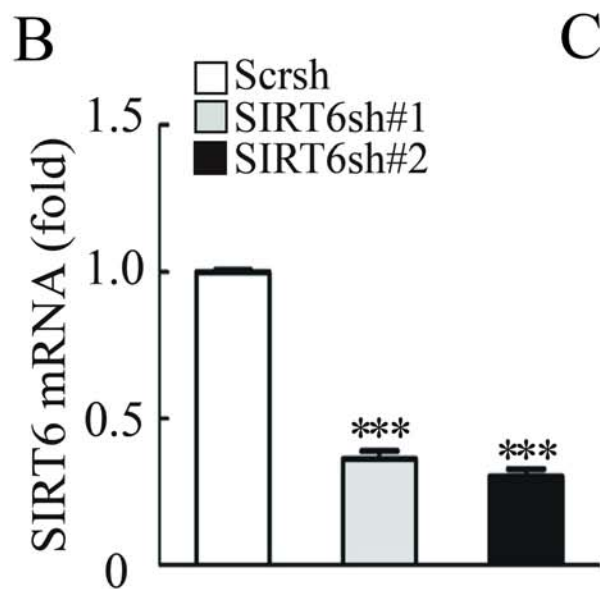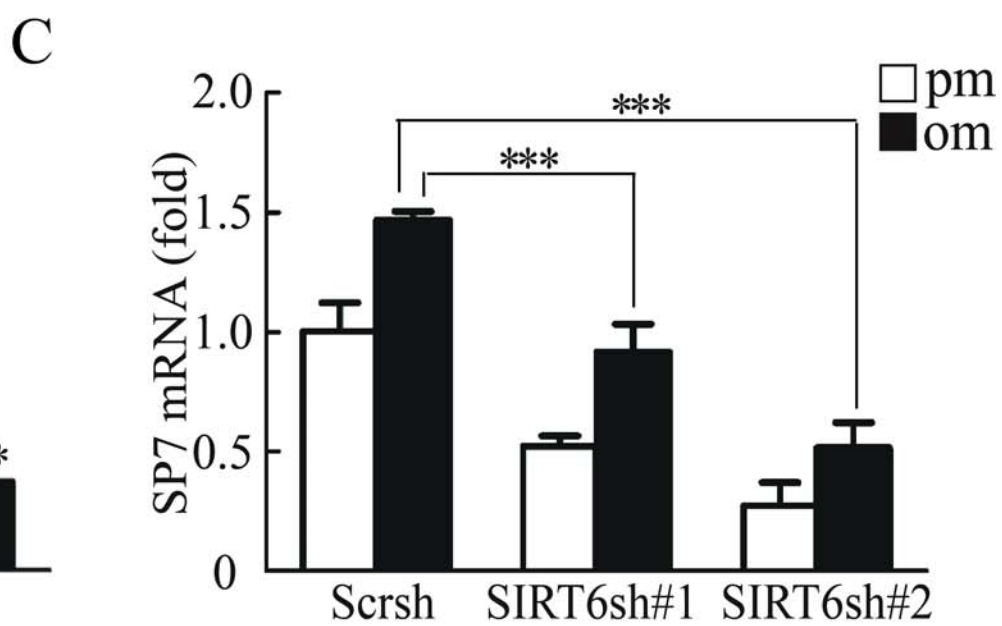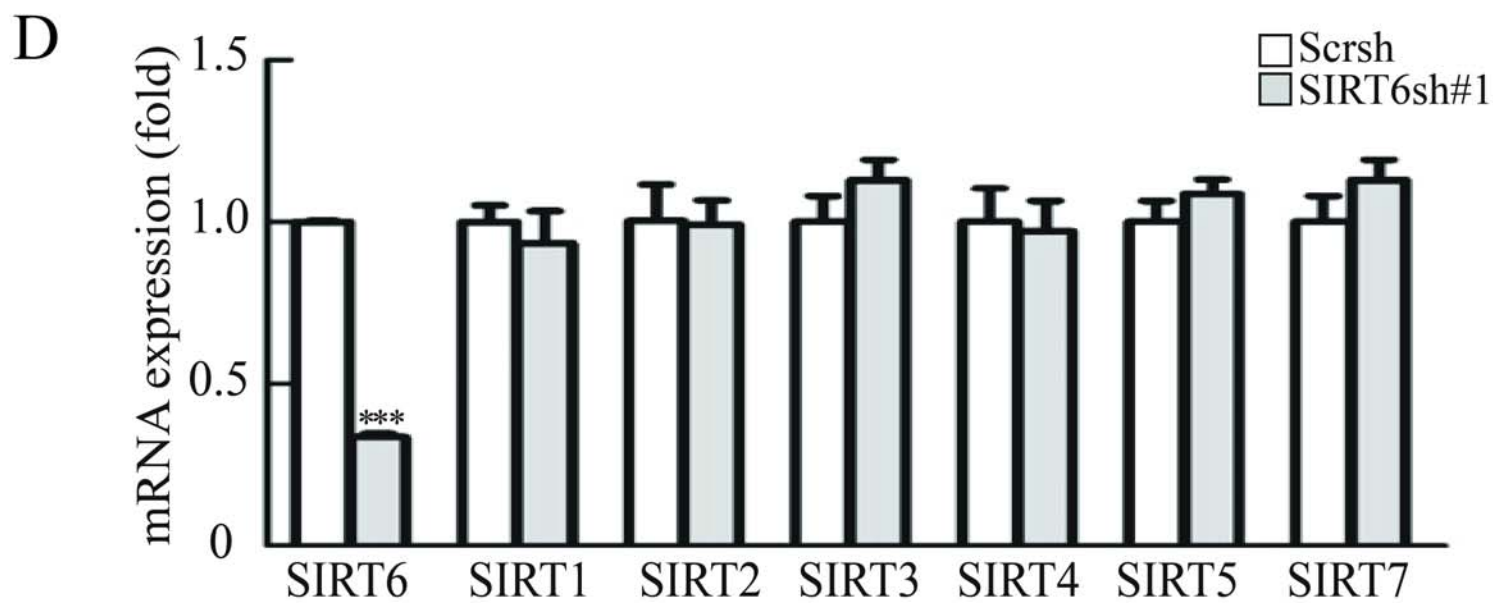

**SFig. 2****A**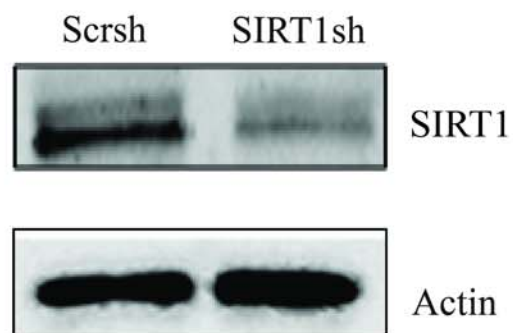**B**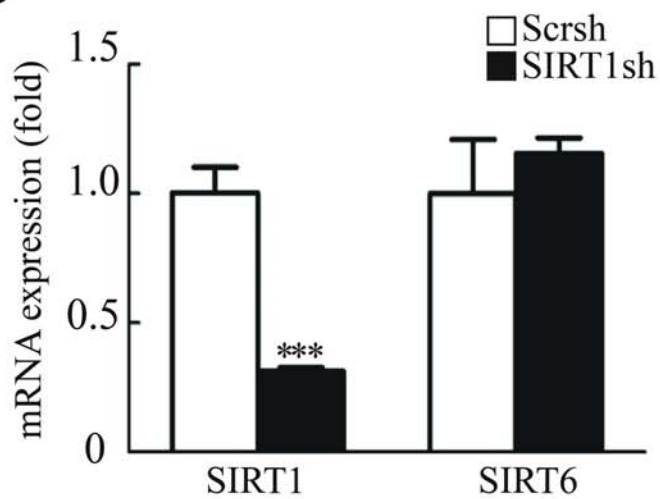**C**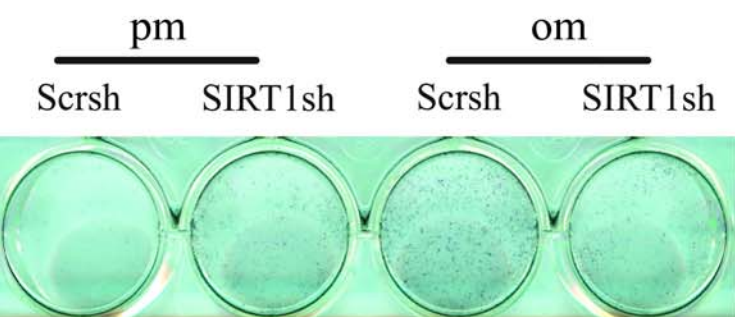**D**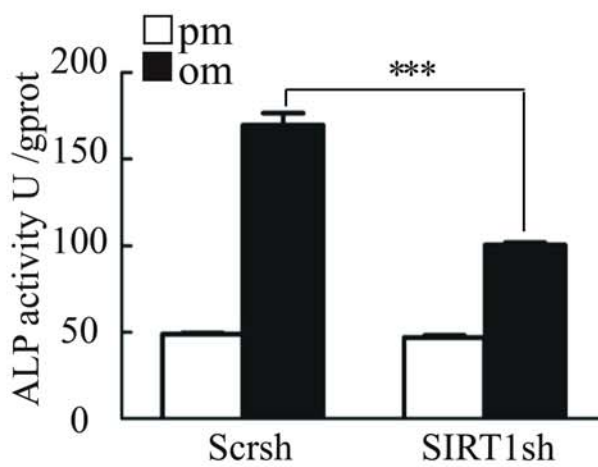**E**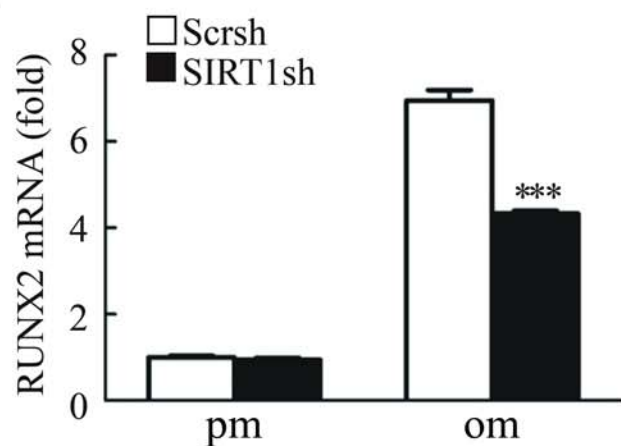**F**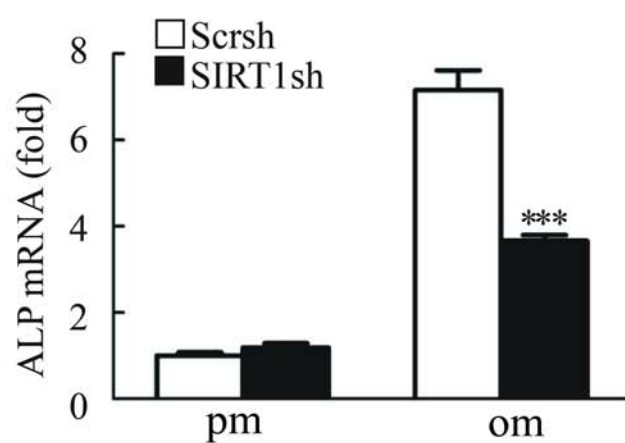

# SFig. 3

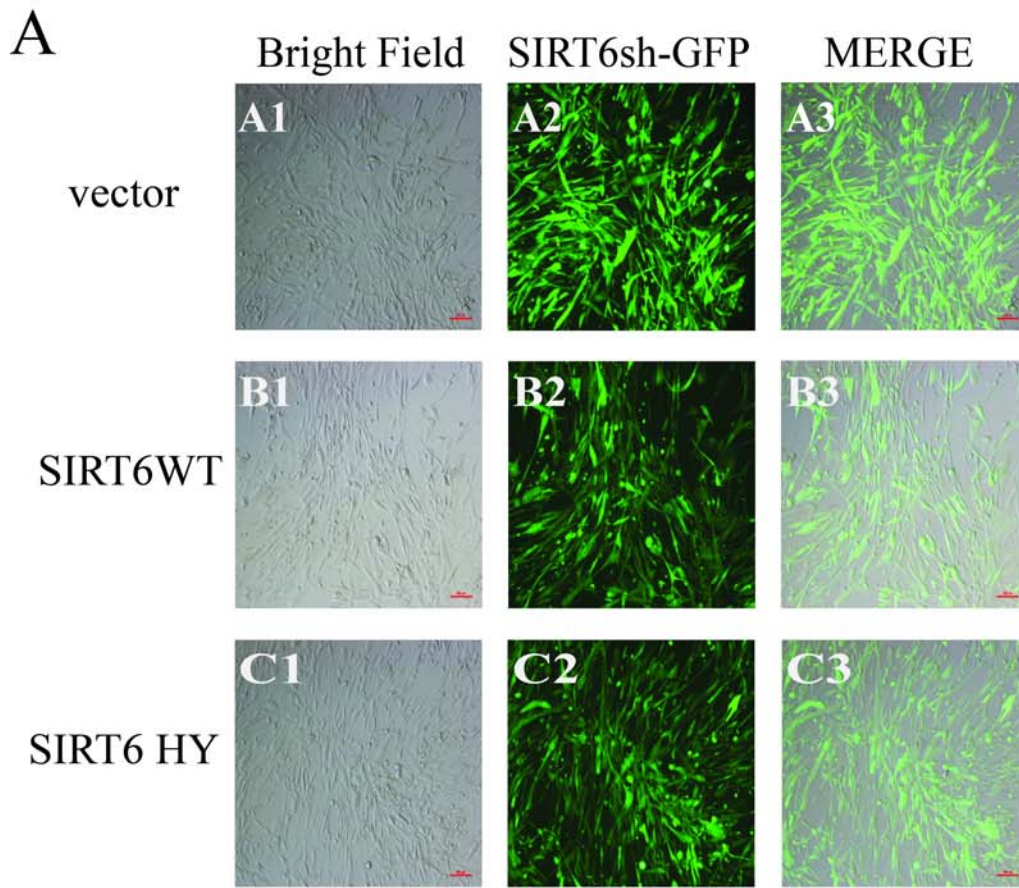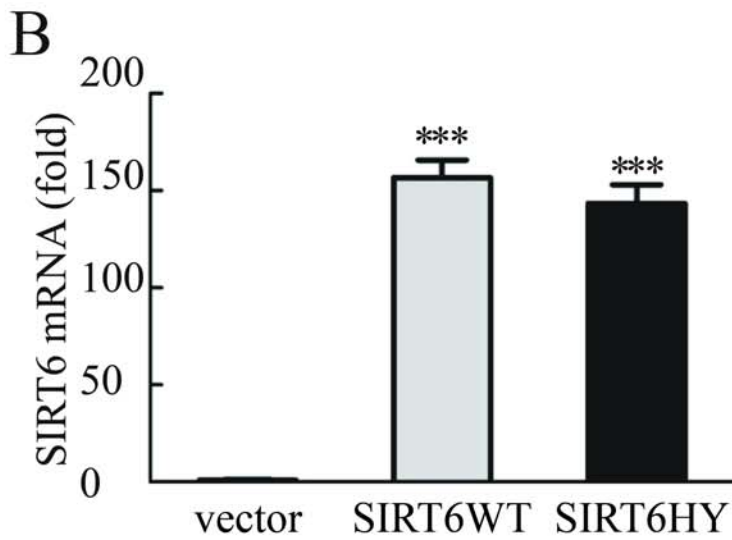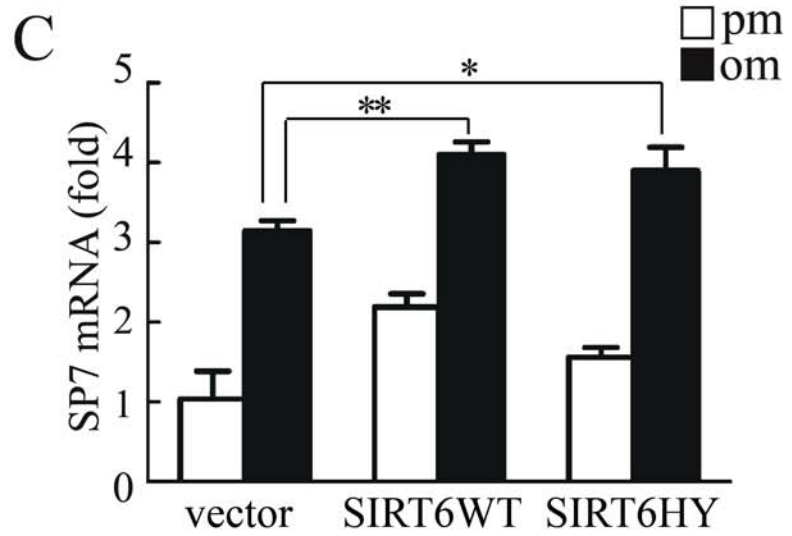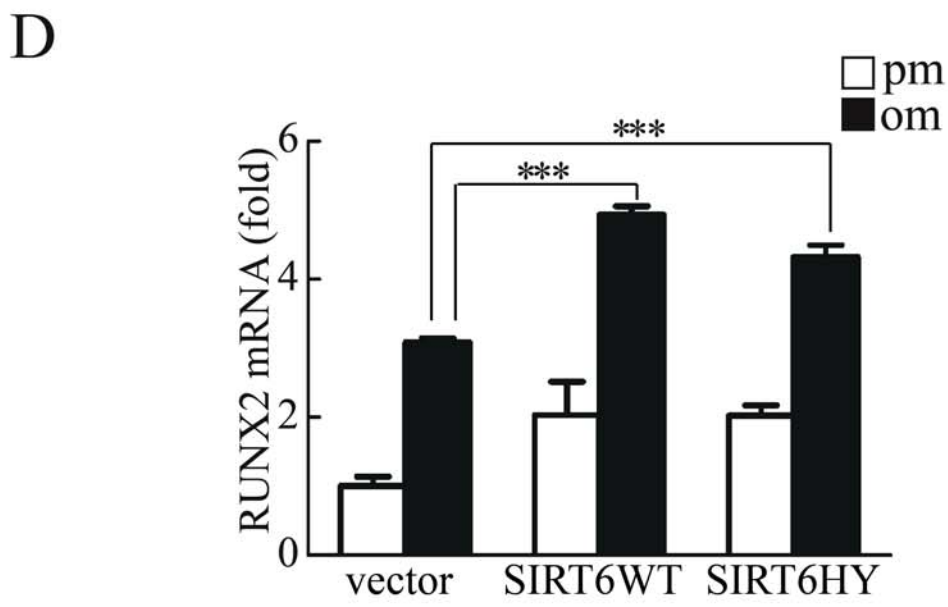

**SFig. 4**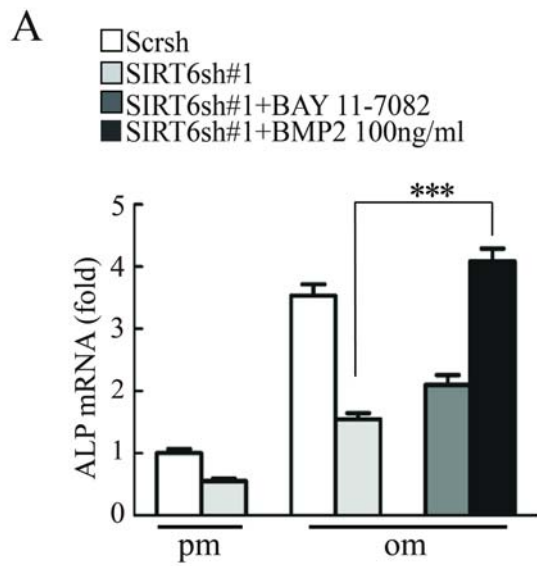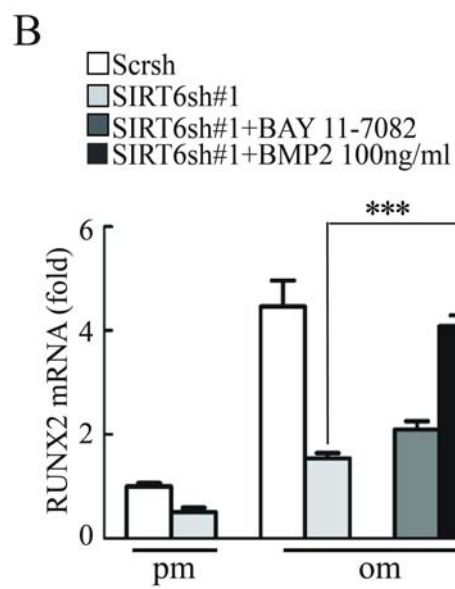



### SFig. 5

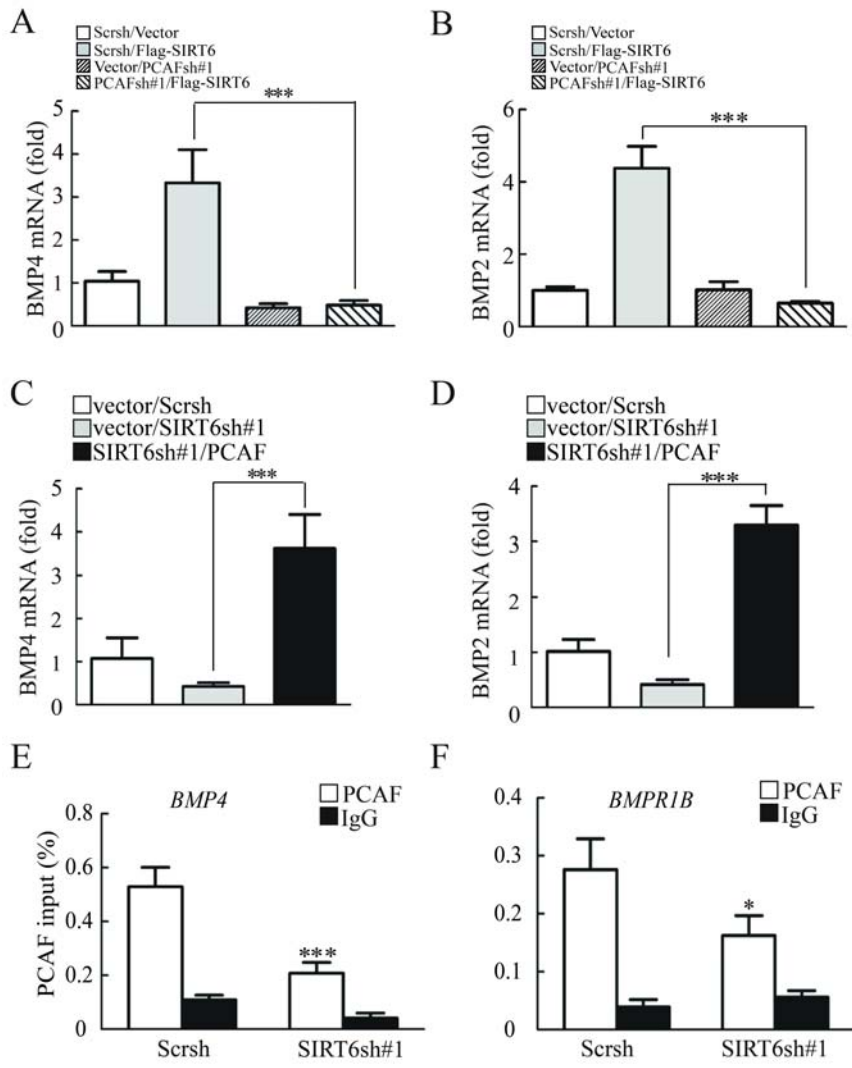

# SFig. 6

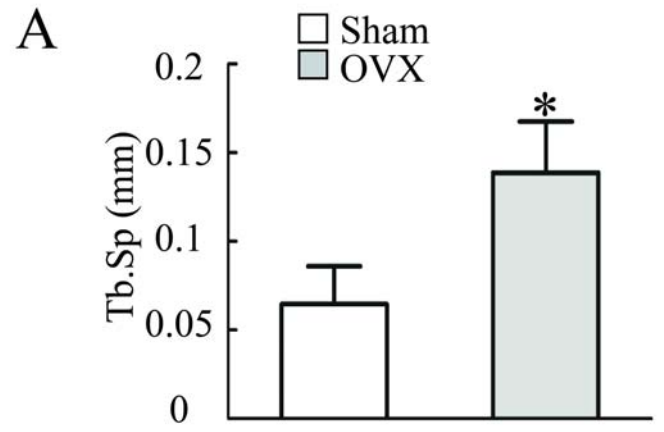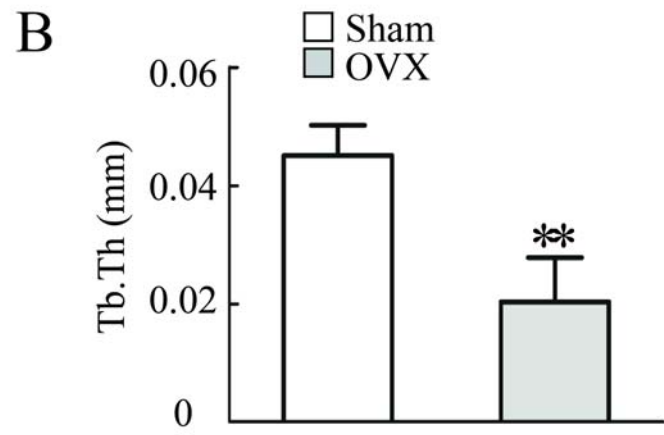

Supplement: 41598_2017_10323_MOESM1_ESM.pdf [file 41598_2017_10323_MOESM1_ESM.pdf]
